# Supplementary material
Source: publisher figshare collection journal article supplement (https://tandf.figshare.com/ndownloader/files/21556467)

Supplementary figure 1: Hematoxylin and Eosin staining of rat kidney sections with. (a) 50 mg/kg bw Thymoquinone (Tq), (b) 100 mg/kg bw curcumin (Cur) showing no signs of toxicity in the kidney tissues.

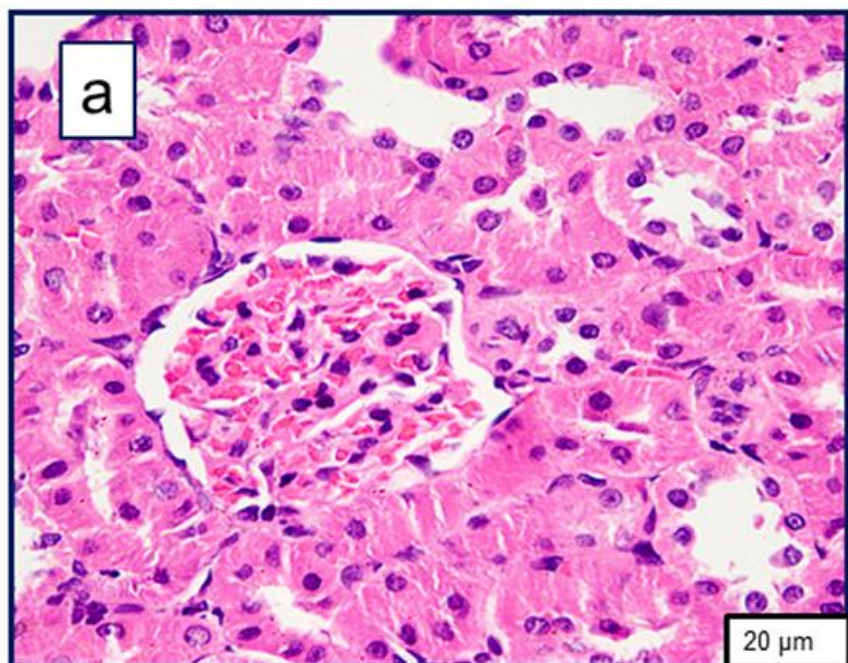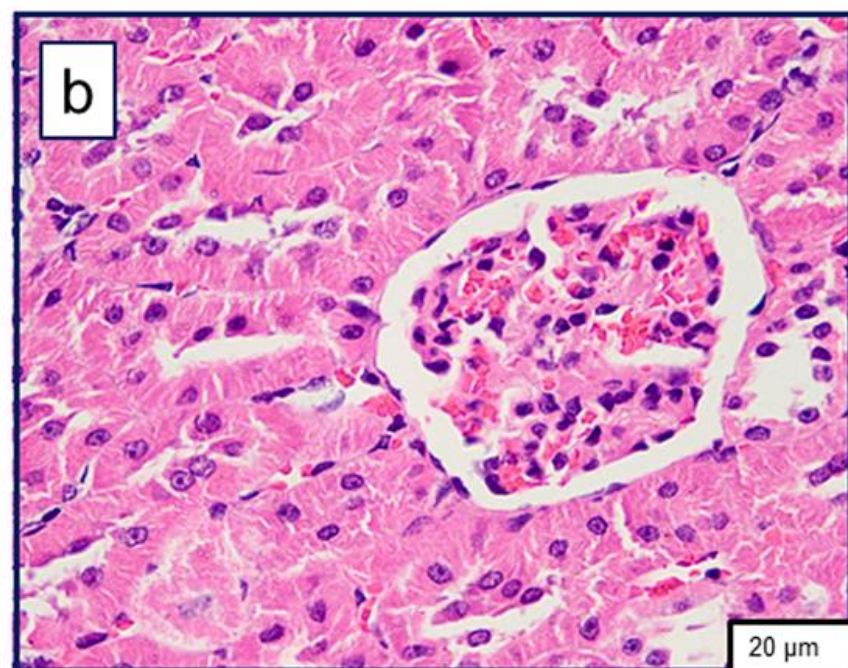

Supplement: Supplementary file 1 [file 21556467]
